# Supplementary material for: Anti-Inflammatory Effects of Mytilus coruscus Polysaccharide on RAW264.7 Cells and DSS-Induced Colitis in Mice
Source: MDPI journal article supplement (doi:10.3390/md19080468), 2021-08-20
Supplement: s1 [file s1]

## Appendix A1

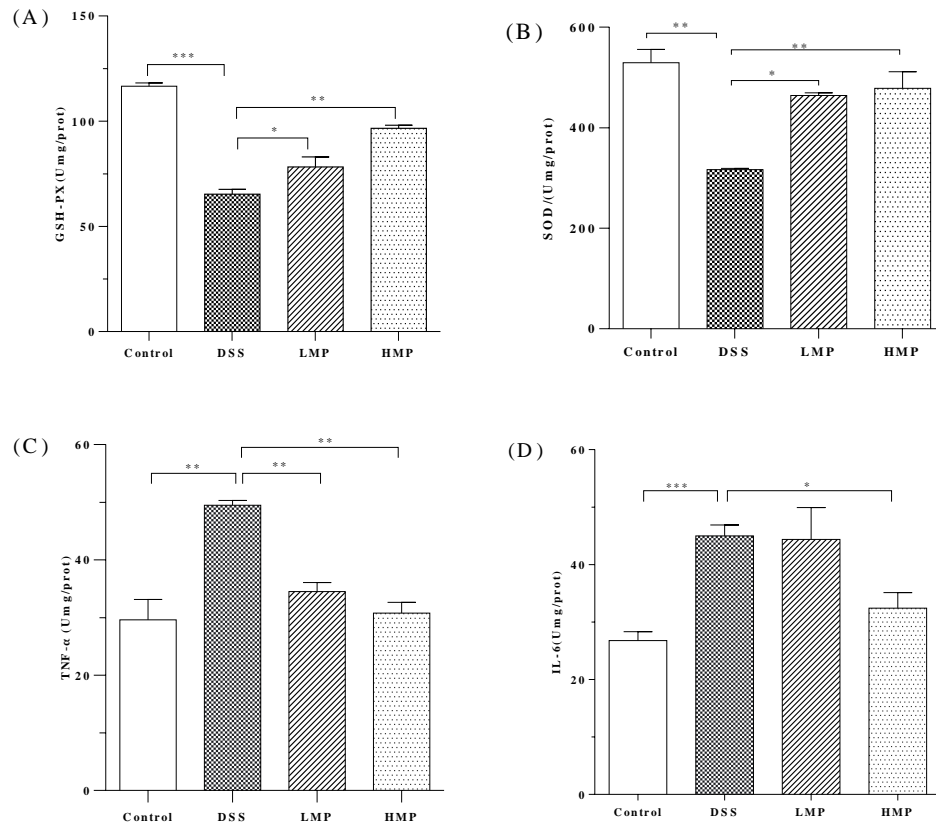

**Scheme 1.** Effect of MP on intestinal oxidative stress (GSH-Px (A) and SOD (B)), and inflammatory response (TNF- $\alpha$  (C) and IL-6 (D)) in DSS-induced colitis mice. The data are presented as means  $\pm$  SEM. Significant differences in the results are analyzed by 1-way ANOVA analysis with post hoc independent samples *t*-tests (*p* values <0.05, <0.01, and <0.001 are indicated by \*, \*\*, and \*\*\*, respectively).

## Appendix A2

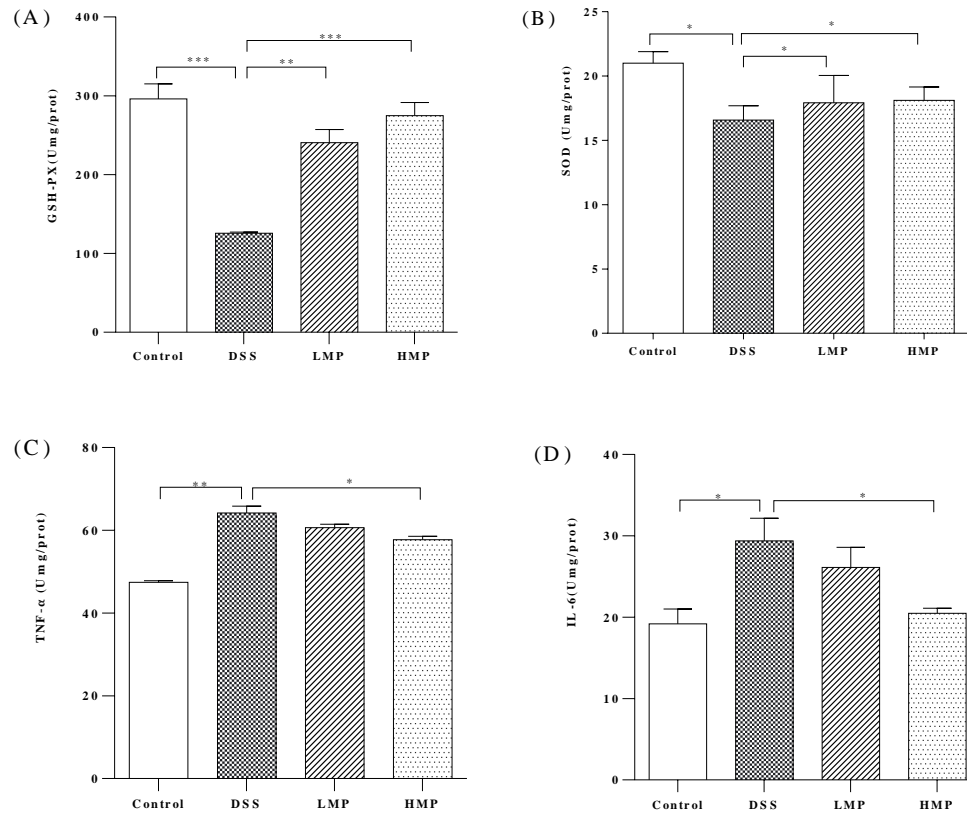

**Scheme 2.** Effect of MP on serum oxidative stress (GSH-Px (A) and SOD (B)), and inflammatory response (TNF- $\alpha$  (C) and IL-6 (D)) in DSS-induced colitis mice. The data are presented as means  $\pm$  SEM. Significant differences in the results were analyzed by 1-way ANOVA analysis with post hoc independent samples *t*-tests (*p* values <0.05, <0.01, and <0.001 are indicated by \*, \*\*, and \*\*\*, respectively).
